1 **Inhibition of Carbonic Anhydrase Using Aspirin is a Novel Method to Block Schistosomiasis**  
2 **Infection of the Parasitic Trematode, *Schistosoma mansoni*, in the intermediate snail host,**  
3 ***Biomphalaria glabrata***

4 Simone Parn<sup>1</sup>, Gabriela Lewis<sup>1</sup>, and Matty Knight<sup>1,2\*</sup>

5

6 1. Division of Science & Mathematics, University of the District of Columbia, 4200 Connecticut Ave.  
7 NW Washington, D.C. 20008, USA

8 2. Department of Microbiology, Immunology & Tropical Medicine, Research Center for  
9 Neglected Diseases of Poverty, School of Medicine & Health Sciences, The George Washington  
10 University Ross Hall, 2300 I Street, NW, Washington, DC 20037, USA

11

12 \*Corresponding author

13 Name: Professor Matty Knight

14 Email: [mathilde.knight@udc.edu](mailto:mathilde.knight@udc.edu); [matty\\_knight@gwu.edu](mailto:matty_knight@gwu.edu)

15

16

17

18

19

20

21

22

23

24

25

26

27

28

29

30 **ABSTRACT**

31 Schistosomiasis is a major public health concern worldwide. Although praziquantel is currently  
32 available as the only treatment option for schistosomiasis, the absence of reliable diagnostic and  
33 prognostic tools highlights the need for the identification and characterization of new drug targets.  
34 Recently, we identified the *B. glabrata* homolog (accession number XP\_013075832.1) of human  
35 CAXIV, showing 37% amino acid sequence identity, from a BLAST search in NCBI (National  
36 Center for Biotechnology Information). Carbonic Anhydrases (CAs) are metalloenzymes that  
37 catalyze the reversible hydration/dehydration of CO<sub>2</sub>/HCO<sub>3</sub>. These enzymes are associated with  
38 many physiological processes, and their role in tumorigenesis has been widely implicated. CAs  
39 create an acidic extracellular environment that facilitates the survival, metastasis, and growth of  
40 cancer cells. In this study, we investigated the role of CA inhibition in *B. glabrata* snails exposed to  
41 *S. mansoni* miracidia. We analyzed the expression of the *B. glabrata* CA encoding transcript in  
42 juvenile susceptible and resistant snails, with and without exposure to *S. mansoni*. Our results  
43 showed that the expression of the CA mRNA encoding transcript was upregulated during early and  
44 prolonged infection in susceptible snails (BBO2), but not in the resistant BS-90 stock. Notably,  
45 sodium salicylate, a form of aspirin, inhibited the expression of CA, post-exposure, to the parasite.  
46 Increasing research between parasites and cancer has shown that schistosomes and cancer cells  
47 share similarities in their capacity to proliferate, survive, and evade host immune mechanisms.  
48 Here, we show that this model system is a potential new avenue for understanding the role of CA  
49 in the metastasis and proliferation of cancer cells. Further studies are needed to explore the  
50 potential of CA as a biomarker for infection in other schistosomiasis-causing parasites, including *S.*  
51 *japonicum* and *S. haematobium*.

52

53 **Keywords:** carbonic anhydrase, infection, sodium salicylate (aspirin), *Schistosoma mansoni*,  
54 *Biomphalaria glabrata*.

55

56

57

58

## 59 1. INTRODUCTION

60 Schistosomiasis is a neglected tropical disease which is estimated to impact more than 600 million  
61 people in the world each year (Verjee, 2019). According to the Centers for Disease Control and  
62 Prevention, it is the second most persistent parasitic disease after malaria (Parasites, 2018). While  
63 schistosomiasis is mostly transmitted in sub-Saharan Africa, cases of its spread to Europe have  
64 been reported (Boissier et al., 2016). The parasites that cause schistosomiasis utilize the  
65 freshwater gastropod pulmonate snails as obligate hosts for the development of its asexual stages.  
66 Contact with contaminated water inadvertently leads to infection by skin penetration with infectious  
67 cercaria that are released into the water from infected snails. After penetrating the skin, cercariae  
68 lose their tail, transforming into schistosomula that develop into mature adult male and female  
69 worms that inhabit the vasculature where they mate to produce eggs that cause widespread  
70 chronic morbidity and infertility among human populations (Schistosomiasis, 2023). Specifically,  
71 infections caused by the species *Schistosoma haematobium* are known to lead to bladder cancer  
72 and female genital schistosomiasis (Hotez et al., 2019). As part of a prevention program, the World  
73 Health Organization (WHO) has proposed that school-aged children aged 5-15 years, who face the  
74 highest infection rates, receive initial parasitological assessment (WHO, 2018). Additionally, the  
75 WHO estimates that by 2030, schistosomiasis will be eliminated as a public health concern (WHO,  
76 2020). Although several attempts have been made toward effective preventative and therapeutic  
77 measures to control the transmission of schistosomiasis, long-term reduction remains elusive. To  
78 combat the widespread disease, better diagnostic and prognostic tools, especially biomarkers to  
79 track the presence of larval parasites in the snail are of immediate necessity.

80

81 The high impact of this disease on global health burden has promoted scientific efforts to tackle the  
82 complex mechanisms underlying successful schistosome infection. The freshwater snail  
83 *Biomphalaria glabrata*, an obligate intermediate host for the parasitic trematode *Schistosoma*  
84 *mansoni*, has been studied for decades at the molecular level to understand its interaction with the  
85 parasite. The genome characterization of the snail *B. glabrata* has allowed for investigation of the  
86 molecular determinants of the snail relationship with the schistosome (Adema et al., 2017). Studies

87 of comparative immunology have enabled scientists to identify genes and pathways involved in the  
88 parasite development (Bridger et al., 2018; Raghavan et al., 2003). Additionally, differential gene  
89 expression studies have led to the identification of several cancer-and stress-related transcripts  
90 that are elevated early and significantly in the susceptible *B. glabrata* snail stocks compared to  
91 their resistant counterparts (Knight et al., 2014).

92

93 Recently, Carbonic Anhydrases (CAs) have been identified as potential targets in the development  
94 of novel drugs for parasitic diseases (Zolfaghari et al., 2022; Angeli et al., 2020). CAs are a family  
95 of zinc-containing enzymes, responsible for the reversible conversion of CO<sub>2</sub> into bicarbonate and  
96 protons (Supuran et al., 2008). In humans, CAs exist in at least 15 isoforms and differ based on  
97 their enzymatic activity and cellular location: hCA I, II, III, VII, and XIII reside in the cytosol; hCA IV,  
98 IX, XII, and XIV are associated with the cell membrane; hCA VA, and VB are mitochondrial; and  
99 hCAVI is found in saliva. These enzymes are important for pH and CO<sub>2</sub> homeostasis regulation,  
100 and for other biosynthesis processes, such as lipogenesis, gluconeogenesis, ureagenesis, and  
101 calcification (Pinard et al., 2015). Aberrant expression of some CA isoforms can lead to pathogenic  
102 outcomes, like carcinogenesis, obesity, and epilepsy (Poggetti et al., 2022). Notably, the  
103 expression of carbonic anhydrase IX is widely described in several hypoxic solid tumors (Svastová  
104 et al., 2004; Pastorekova et al 2019; Becker et al., 2020). In the acidic microenvironment, CAIX  
105 allows tumor cells to adapt by seizing the high CO<sub>2</sub> in the form of hydrogen and bicarbonate ions.

106

107 We found through *in silico* analysis, the presence of CA in the snail *B. glabrata* genome and  
108 confirmed its evolutionary conservation. Further gene expression analysis using qPCR revealed a  
109 significant upregulation of CA in the snail upon exposure to the parasite *S. mansoni*, prompting us  
110 to further investigate its role in the snail-schistosome interaction. In this study, we investigated the  
111 expression of CA encoding transcript in susceptible and resistant *B. glabrata* stocks in response to  
112 early and prolonged exposure to *S. mansoni*. Given CA's involvement in tumor progression and its  
113 similarity to the human enzyme, we hypothesized that the snail/schistosome relationship could  
114 mimic the activity of human CA in cancer cells. Here, we show that CA serves as a potentially  
115 useful biomarker for detecting schistosomiasis infection in infected snails, with the ability to

116 differentiate disease from normal unaffected snails. Furthermore, we found that sodium salicylate,  
117 a water-soluble form of aspirin, inhibits the CA transcript in susceptible snail stocks. These findings  
118 provide insight into the potential role of CA in the development and progression of schistosomiasis  
119 and its potential as a therapeutic target.

120

## 121 **2. MATERIALS AND METHODS**

122

### 123 **2.1 *Biomphalaria glabrata* Stocks**

124

125 The *Biomphalaria glabrata* juvenile (3-5 mm in diameter) susceptible (BBO2) and parasite resistant  
126 (BS90) snail stocks were utilized in the study. Snails were maintained in aquaria in de-aerated  
127 water and fed with romaine lettuce twice a week.

128

### 129 **2.2 Snail exposure to *S. mansoni* miracidia**

130

131 Miracidia hatched from eggs isolated from 7 weeks infected mice livers were collected from the  
132 Biomedical Research Institute (Rockville, MD). Both BBO2 and BS90 juvenile snails (3mm in  
133 diameter) were exposed individually to 10-12 miracidia in 1.0 ml de-aerated water in a 6-well  
134 microtiter plate at room temperature. The snails were exposed for different time points at 0 min, 30  
135 min, 1hr, 2hr and 4hr. Following exposure, snails were either processed in 500 µl of RNAzol  
136 immediately or kept at -80°C until needed.

137

### 138 **2.3 BLAST analysis and primer design**

139

140 Several bioinformatics approaches were used to test the working hypothesis. First, we searched  
141 for *B. glabrata* homologs of human related Carbonic Anhydrase encoding transcript using the  
142 protein database Uniprot ([www.uniprot.org](http://www.uniprot.org)). The amino acid or FASTA file sequences were  
143 individually deposited into the Basic Local Alignment Search Tool (BLAST) (Altschul et al., 1990) to  
144 identify the *B. glabrata* homolog. The analysis was followed by a SMART BLAST analysis to

145 validate the identity of the *B. glabrata* homolog and evolutionary relatedness to other vertebrate  
146 and invertebrate organisms' amino acid sequence, including human. We then used the mRNA  
147 transcript of corresponding *B. glabrata* protein to design gene specific primers (Smith et al., 2021).  
148 The primers were designed excluding the *S. mansoni* corresponding CA ortholog. Oligonucleotide  
149 Primers for qPCR were obtained from Eurofins Genomics (Louisville 13 KY, 40204).

150

#### 151 **2.4 Trans-well *in vitro* co-culture of miracidia with *B. glabrata* embryonic cell line (BGE)**

152

153 Bge cells were cultured as previously described, but in 6-well microtiter plates to confluency  
154 (Coelho et al., 2020).

155

#### 156 **2.5 RNA extraction**

157

158 Total RNA was extracted from whole juvenile snails (unexposed and exposed) using the RNAzol  
159 method, according to the manufacturer's instructions (Sigma- Aldrich, USA). Briefly, 500 µl of  
160 RNAzol reagent was added to the snail samples and homogenized using a pestle and a motor.  
161 Homogenate was mixed with 200 µl of sterile dH<sub>2</sub>O, vortexed and incubated at room temperature  
162 for 10 min before centrifugation at 13, 000 x g for 10 min at 26°C. Ethanol (75%) was added to the  
163 recovered supernatant after centrifugation and samples were incubated on ice for 10 min before  
164 another centrifugation at 13, 000 x g for 10 min at 4°C. The supernatant was removed while the  
165 pellet was left undisturbed. The pellet was washed with 70% ethanol and centrifuged at 13,000x g  
166 for 10 min at 4°C. The alcohol wash was removed, and the pellet was air-dried. RNA pellets were  
167 dissolved in 20 µl of RNase-free dH<sub>2</sub>O. RNA yield was determined by quantitation under UV  
168 absorbance at wavelength 260 nm using the NanoDrop 1000 spectrophotometer (Thermo  
169 Scientific). RNA samples were used either immediately or kept frozen at -80°C until needed to  
170 synthesize cDNA. Trace amounts of contaminating genomic DNA were removed by treating all  
171 RNA samples with RNase-free DNase I prior to use for cDNA synthesis according to the  
172 manufacturer's instructions (Promega, WI).

173

## 174 **2.6 cDNA synthesis and qualitative RT-PCR**

175

176 Complementary DNA was synthesized from total RNA using a cDNA synthesis kit (ThermoFisher  
177 Scientific). Briefly, a master mix was prepared using 5X Reverse Transcriptase Buffer, 100 mM  
178 DTT, RNase OUT, Oligo DT, 100 mM dNTPs and Reverse transcriptase, which was aliquoted to  
179 labelled 1.5ml Eppendorf tubes. 1 ul of RNA (500ng) was used per reaction. The tubes were  
180 incubated at 42°C water bath for 2 hours and DNA concentrations were measured using NanoDrop  
181 at the wavelength of 260 nm. DNA samples were then diluted to 200ng each for qualitative PCR  
182 reaction. Experimental and reference (myoglobin) primers were diluted to 15 uM. In addition to  
183 diluted primers, the reaction was synthesized using nuclease free water, Taq Polymerase, dNTPs  
184 and Mg<sup>+2</sup> 10X Buffer in a preheated thermocycler for 2 hours. Amplified PCR products were  
185 analyzed by 1.2% TBE- agarose electrophoresis.

186

## 187 **2.7 Real-time quantitative RT-PCR**

188 The real-time PCR measurement of cDNAs was performed using PowerUp SYBR Green Master  
189 Mix (Applied Biosystems) and normalized to the expression of myoglobin as standard for the  
190 housekeeping gene. The primers were: Carbonic Anhydrase forward: *caggagcagtttaggaagggc*;  
191 Carbonic Anhydrase reverse: *tcggctcaaaactcacctcc*; Myoglobin forward: *gatgttcgccaatgttccc*;  
192 Myoglobin reverse: *agcgatcaagtttccccag*. Each sample was run in technical triplicate. qRT-PCR  
193 was performed using Applied Biosystems 7300 RT PCR system, as described previously (Smith et  
194 al., 2021).

## 195 **2.8 Treatment of susceptible snails with sodium salicylate**

196 To determine the effect of sodium salicylate on naïve snails, snails were treated with 100ng/ml of  
197 sodium salicylate (Sigma Aldrich, St. Louis, MO) overnight (18 hours) at room temperature in 6-  
198 well microtiter plates (Smith et al., 2021). Following overnight treatment, snails were washed in  
199 nuclease free water and placed in 24-well microtiter plates. These snails were either unexposed (0  
200 min) or individually exposed to *S. mansoni* 10-12 miracidia for 120 minutes at 25 °C. Exposed and

201 unexposed snails were processed for RNA as described above or kept in beakers to evaluate  
202 cercaria shedding at 4, 6 -weeks post-exposure to infection. The inhibitory concentration was  
203 investigated by means of 2-fold dilution of inhibitor.

## 204 **2.9 Statistical analysis**

205 Statistical analyses were performed using GraphPad Prism 8 software. All data are presented as  
206 mean  $\pm$ SD. Differences between the groups were assessed using Student's *t* test, Welch's *t* test  
207 and 2-way analysis of variance (ANOVA) and Tukey's test wherever relevant by comparing the  
208 differential expression (delta-Ct value) of the transcripts among treatment and control groups. Fold  
209 change was determined by utilizing uniform expression of the housekeeping myoglobin transcript  
210 as standard. Differences were considered statistically significant if  $p < 0.05$ , with level of significance  
211 denoted as follows, \*\*\*\*,  $p \leq 0.0001$ , \*\*\*,  $p \leq 0.001$ , \*\*,  $p \leq 0.01$ , \*,  $p \leq 0.05$ , and ns,  $p > 0.05$ .

212

## 213 **3. RESULTS**

214

### 215 **3.1 Carbonic anhydrase is highly conserved in *B. glabrata***

216 Based on previous RNAseq analysis (Smith et al., 2021), we identified and validated the  
217 differential expression of carbonic anhydrase protein (Accession number XP\_013085564) through  
218 a BLAST analysis. Utilizing SMART BLAST analysis, we revealed the evolutionary relatedness of  
219 the Carbonic Anhydrase in *B. glabrata* to that of other organisms (**Fig. 1**). Our phylogenetics  
220 results showed that *B. glabrata* is closely related to vertebrates (house mouse, zebrafish and  
221 human) and an invertebrate fruit fly (*D. melanogaster*), indicating co-evolution of parasitism in  
222 these organisms. Likely, the CA gene has been selected over millions of years to accommodate  
223 the parasite in these invertebrate and vertebrate hosts (**Table 1, Fig. 1**). Interestingly, using Clustal  
224 Omega, we aligned the CA encoding enzyme corresponding to *B. glabrata* and *S. mansoni* and  
225 observed a 34.7% amino acid identity (**Supp. Fig. 1**). Further analysis showed that the CA  
226 encoding transcript denotes a single copy gene in the *B. glabrata* genome.



|                                                                          | Query<br>Cover | E Value  | Percent<br>Identity | Accession      |
|--------------------------------------------------------------------------|----------------|----------|---------------------|----------------|
| <i>carbonic anhydrase 14 isoform X1</i><br>[ <i>Homo sapiens</i> ]       | 85%            | 6,00E-19 | 37.82%              | XP_005245116.1 |
| <i>carbonic anhydrase 14 precursor</i><br>[ <i>Danio rerio</i> ]         | 85%            | 1,00E-17 | 34.71%              | NP_001315073.1 |
| <i>carbonic anhydrase 1</i> [ <i>Drosophila</i><br><i>melanogaster</i> ] | 66%            | 1,00E-17 | 45.45%              | NP_523561.1    |
| <i>carbonic anhydrase 12 isoform X1</i><br>[ <i>Mus musculus</i> ]       | 71%            | 3,00E-17 | 41.18%              | XP_006511611.1 |
| <i>carbonic anhydrase 14 isoform X6</i><br>[ <i>Homo sapiens</i> ]       | 71%            | 4,00E-17 | 43.00%              | XP_016856382.1 |
| <i>carbonic anhydrase</i> [ <i>Schistosoma</i><br><i>mansonii</i> ]      | 86%            | 3,00E-31 | 34.70%              | QDD67328       |

227 **Table 1. Amino acid sequence alignment analysis of *B. glabrata* Carbonic Anhydrase 14-like**  
228 **protein indicates high evolutionary conservancy in relation to several organisms.**

229

### 230 **3.2 Carbonic anhydrase is a surrogate marker of infection**

231

232 To determine whether changes in the expression of CA occur in juvenile *B. glabrata* snails after  
233 parasite exposure, qPCR was utilized to measure temporal changes at different time-points after  
234 exposure to *S. mansoni* miracidia. Results showed that CA was differentially expressed between  
235 susceptible (BBO2) and resistant (BS-90) snail stocks upon early exposure to the parasite. Thus, a  
236 significant upregulation (1.42-fold) was observed following 2h post-exposure, increasing to 1.77-  
237 fold after 4hr infection in the susceptible snail (**Fig. 2**). Moreover, sustained expression of CA  
238 mRNA was observed throughout the prolonged 6- week infection period of the susceptible snail  
239 (**Fig. 3**). The CA mRNA transcript was significantly upregulated between 1 to 6 weeks (1.9- to 8-  
240 fold) post- exposure in the susceptible BBO2 snails but not in the resistant BS90 snails. To further

241 test the expression of CA, we validated the results using the *B. glabrata* embryonic cell line (BGE)  
242 co-cultured with *S. mansoni* miracidia. Our results showed that CA was upregulated by 1.1-fold at  
243 0.5-hour and by 1.4-fold following 2-hour exposure to miracidia (**Fig. 4**). Interestingly, similar to CA  
244 expression in susceptible BBO2 snails, CA expression in BGE cell line alone was down-regulated  
245 at the 1-hour mark.

246

### 247 **3.3 Sodium salicylate is a potent inhibitor of carbonic anhydrase**

248

249 We also investigated the potential of aspirin to inhibit CA expression in susceptible BBO2 snails.  
250 To achieve this, we utilized sodium salicylate, a major metabolite of aspirin, which is a water  
251 soluble non-steroidal anti-inflammatory agent known to induce apoptosis of cancer cells and  
252 reduce tumor growth (National Center for Biotechnology Information, 2023). Treatment of BBO2  
253 snails with 100 ng/ml sodium salicylate overnight (18 hours) prior to schistosome exposure was  
254 shown to suppress CA expression (**Fig. 5**). Through a 2-fold serial dilution assay of the drug, we  
255 determined the required inhibitory concentration of sodium salicylate for suppressing CA  
256 expression. Our findings, as seen from **Figure 6**, consistently showed downregulation of CA  
257 encoding RNA transcript. Notably, a concentration as low as 12.5 ng/mL of sodium salicylate was  
258 sufficient to inhibit CA. Importantly, CA expression remained downregulated in sodium salicylate  
259 treated snails with exposure to the parasite *S. mansoni*.

260

### 261 **3.4 Sodium salicylate may reduce infection burden in susceptible *B. glabrata* snails**

262

263 To test the effects of suppression of CA gene *in vivo*, sodium salicylate treated BBO2 snails were  
264 maintained after exposure to parasite to examine for cercariae shedding after 4-6 weeks. Our  
265 results indicated that a one-time overnight treatment with 100 ng/mL sodium salicylate prior to  
266 schistosome infection (2-hour exposure) was insufficient to block infection in the snails. While  
267 neither the non-treated infected snails nor the drug- treated infected snails shed at 4 weeks,  
268 following 6 weeks' time, all snails shed cercaria (**Fig. 5**). Non drug-treated infected control snails  
269 shed the highest number of cercariae. Similarly, one-time drug treated snails shed cercariae,

270 although at lower levels. Following the experiment, we repeated the sodium salicylate treatment in  
271 susceptible BBO2 snails, this time maintaining the infected snails continuously in 100 ng/ml  
272 sodium salicylate both before (overnight) and after 2-hour exposure to the parasite. Following 4  
273 weeks of exposure, we observed a decrease (1 cercariae shed) or complete absence of cercarial  
274 shedding in the treated/exposed snails compared to the non-treated/exposed control group which  
275 shed an average of 9 cercaria. Surprisingly, cercarial shedding was observed in the daily drug-  
276 treated infected snails at 6 weeks, however, at lower levels compared to the non-drug treated  
277 infected control group and one-time drug-treated infected snails (**Fig. 5**).

278

#### 279 **4. DISCUSSION**

280

281 Schistosomiasis remains a serious public health concern, especially in many low-income sub-  
282 Saharan African areas. To date, however, the only known effective treatment against the causative  
283 agent of schistosomiasis- the parasitic trematode, is praziquantel (Schistosomiasis, 2023).  
284 Schistosomiasis is endemic in 78 countries and at least 600 million people are at risk of becoming  
285 infected every year (Schistosomiasis, 2023). The WHO has announced that by 2030  
286 schistosomiasis will be eradicated (WHO, 2020). However, without a preventative vaccine, and  
287 only a single therapeutic drug currently available, this might prove elusive. Efforts to control  
288 schistosomiasis have been attempted by a mass drug chemotherapy program that provided  
289 treatment for school aged children (Kokaliaris et al., 2022). The detection of infection in patients  
290 relies on the detection of parasite eggs in stool (*S. mansoni*, and *S. japonicum*) and urine (*S.*  
291 *hematobium*) (Schistosomiasis, 2023). For the past 18 years this method of controlling  
292 schistosomiasis, although successful, has not eliminated the disease. This is because the parasite  
293 is difficult to completely eliminate without attention to the transmission in the intermediate snail  
294 host.

295

296 The control of the freshwater snail has been made possible largely by the use of molluscicides that  
297 can be environmentally toxic as well as disturbing fragile ecosystems. There are currently no  
298 reliable convenient biomarkers available for the detection of the parasite in infected snails.

299 Previous studies have described the cloning and characterization of 121-bp tandem DNA repeat  
300 sequences in the schistosomal genome (Hamburger et al., 1987). Although, the application of such  
301 DNA based probes presents a high detection sensitivity, the degree of specificity has not been  
302 addressed. Furthermore, these studies have not demonstrated the specific time-points at which the  
303 infection in snails can be detected. Results from our study show that the presence of carbonic  
304 anhydrase is a good and accurate biomarker for early and prolonged detection of *S. mansoni* in  
305 the intermediate snail host, *B. glabrata*.

306

307 From qPCR analysis, temporal regulation during the initial 30 minutes to 4 hours post exposure of  
308 the snail to the parasite revealed that CA is upregulated in susceptible BBO2 snails during early  
309 infection but downregulated in their resistant counterparts. Given that CAs are predominantly  
310 involved in hypoxia and pH regulation in cancer cells, we observed a significant upregulation of CA  
311 expression in susceptible snail lines, with a 1.42-fold increase after two hours of exposure and  
312 1.77-fold increase post four hours (**Fig. 2**). Moreover, we found that CA mRNA levels were further  
313 increased in susceptible snails during prolonged infection up to 6 weeks (**Fig. 3**), indicating the  
314 critical role of CA in upholding the proliferative function. To further validate the results, we used the  
315 *B. glabrata* embryonic cell line (BGE) co-cultured with *S. mansoni* miracidia and observed a 1.4-  
316 fold upregulation of CA transcripts at the two-hour infection period (**Fig. 4**). Our previous research  
317 has demonstrated that transcripts encoding the heat shock proteins Hsp70 and Hsp90, including  
318 the reverse transcriptase (RT) domain, the non-LTR-transposon nimbus, are similarly upregulated  
319 in the susceptible snails but not in resistant (Ittiprasert et al., 2009). Further studies from spatial  
320 repositioning of gene loci have confirmed that schistosomes orchestrate transcription of Hsp70  
321 transcript in susceptible *B. glabrata* snails quickly after infection (Arican-Goktas et al., 2014).

322

323 CAs also serve as important therapeutic targets in various biological processes, including acid-  
324 base balance, inflammation and angiogenesis. In humans, there are 15 CA isoforms (alpha-class  
325 CAs), with CA IX and CA XII having been linked to cancer (Supuran et al., 2008). These enzymes  
326 are transmembrane isoforms with an extracellular catalytic domain, showing high expression in  
327 solid tumors and low expression in normal tissues. The overexpression of CA IX and CA XII in

328 tumors is associated with the survival and proliferation of cancer cells, making them attractive  
329 targets for cancer therapy (Mahon et al., 2015). In this study, we specifically examined CA isoform  
330 XIV, which has a medium-low catalytic activity similar to that of hCA XII (Nishimori et al., 2005).  
331 This isoform is highly abundant in the brain, kidneys, colon, small intestine, urinary bladder, liver,  
332 and spinal cord (Alterio et al., 2014). A Clustal Omega sequence alignment (Sievers et al., 2011)  
333 showed high amino acid conservation among the human  $\alpha$ -CAs, specifically in the catalytic sites.  
334 Results indicated that the active site of these enzymes are highly superimposable, suggesting  
335 similar evolutionary conserved enzymatic activity among the CA encoding transcripts between the  
336 snail homolog and the other organisms. Of particular interest, structural comparison of the hCA IX  
337 catalytic domain with the CA 14-like *B. glabrata* homolog yielded a substantial sequence homology  
338 (**Supp. Fig. 2**). While the two enzyme orthologs share 35.97% sequence identity in the catalytic  
339 sites, further interrogations of the sequences revealed that the two proteins consist of identical zinc  
340 binding sites (ion binding), specifically, the three conserved histidine residues (His94, His96, and  
341 His119). This homology suggests that the isoforms may share similar functions, and one isoform  
342 may be able to compensate for the loss of the other (Aggarwal et al., 2013).

343

344 We have shown there is a link between metastatic cancers and parasitic diseases, highlighting the  
345 snail host/parasite relationship as a valuable animal model for studying the regulation of cancer-  
346 associated transcripts. Similar to cancer, the schistosome survives in the blood stream and evades  
347 the host immune system mechanisms. Deposition of *S. mansoni* eggs also causes acute and  
348 chronic inflammation of the colorectal mucosa (McManus et al., 2018). Our results indicate that CA  
349 plays a key role in the progression of schistosomiasis infection in the snail, with prolonged infection  
350 leading to increased expression of CA transcripts. CA's role in facilitating the transport of CO<sub>2</sub>  
351 across the cell membrane creating acidic environment, is one of the hallmarks of cancer. In accord  
352 with studies from CA in cancer, several human CA isoforms have been shown to be increased in  
353 tumor tissue, correlating with cancer growth and survival (Ning et al., 2022; McDonald et al., 2019;  
354 Hsieh et al., 2022; Schmidt et al., 2021). This supports the notion that the snail-schistosome model

355 can provide useful insights into the mechanisms underlying both parasitic infections and cancer  
356 (manuscript in preparation).

357 Targeting CA has emerged as a promising therapeutic strategy for cancer treatment with  
358 numerous CA inhibitors currently undergoing preclinical and clinical trials (Mussi et al., 2022;  
359 Dvořanová et al., 2020). It has been well established that a positive correlation exists between risk  
360 of cancer and aspirin intake. As part of this, several clinical trials have investigated the use of  
361 aspirin as an adjuvant therapy for cancer patients, particularly those with colorectal cancer  
362 (Sostres et al., 2014; Rothwell et al., 2010). We show in this study that sodium salicylate, a major  
363 subunit of aspirin, can inhibit CA in susceptible BBO2 snails. Although our results from qPCR show  
364 that sodium salicylate down regulates the transcript encoding carbonic anhydrase, we found that a  
365 single dose of 100 ng/ml sodium salicylate is not sufficient to block infection, likely due to its  
366 metabolism and short half-life. However, daily administration of 100 ng/ml sodium salicylate can  
367 further reduce the infection burden compared to a single dose and normal infected snails.  
368 Combination therapy involving aspirin may offer greater therapeutic benefits, as evidenced by  
369 Feitosa, et al. demonstrating a reduction in parasite load in *S. mansoni* mice (Feitosa et al., 2018).  
370 Furthermore, the combination of praziquantel and aspirin has been shown to decrease liver  
371 pathology, highlighting the potential of this treatment approach (Sudsarn et al., 2016).

372

373 Our present work demonstrates the feasibility of detecting early and prolonged *S. mansoni*  
374 infection in snails by employing a simple and accurate procedure using qPCR. However, our study  
375 has some limitations that need to be taken into account before considering the application of CA  
376 for field studies. Firstly, considering the role of CA in acid-base regulation and creating acidic  
377 environments, change in CA activity and pH upon infection remains to be investigated further with  
378 more experiments. Secondly, to gain a better understanding of the mechanism of action of CA,  
379 further studies to determine its enzymatic activity are needed. Thirdly, the degree of enzyme  
380 activity remains to be evaluated in other schistosomiasis-causing trematodes, *S. japonicum* and *S.*  
381 *haematobium*. In addition, antibody detection assays are being developed to make the use of CA

382 for rapid and practical use in the field to detect occurrence of infected snails in endemic high  
383 prevalence area before using molluscicides which can be expensive to use on a wide scale.

384

385 In summary, we have shown in this study that CA overexpression is correlated with infection and  
386 parasite progression in the snail host. We provide the first evidence of CA in mollusk species upon  
387 infection with *S. mansoni* and our research shows that treatment with salicylic acid is a competent  
388 method of inhibiting CA activity in the *B. glabrata* snail, thus inhibiting the infection of the snail with  
389 the *S. mansoni* parasite. These results indicate that CA is a promising biomarker to track  
390 schistosomiasis in early and prolonged infection stages.

391

### 392 **Acknowledgements**

393

394 We thank Dr. Margaret Mentink-Kane at the NIAID Schistosomiasis Resource Center of the  
395 Biomedical Research Institute for the snail and parasite material used in this study. We also thank  
396 Dr. Carolyn Cousin for resources and support. This work was funded by the Clement BT Knight  
397 Cancer Foundation.

### 398 **CRedit authorship contribution statement**

399 **Simone Parn:** Investigation, Methodology, Data Curation, Formal Analysis, Validation,  
400 Visualization, Writing – Original Draft, Writing – Review & Editing; **Gabriela Lewis:** Investigation,  
401 Methodology, Data Curation, Validation, Writing – Review & Editing; **Matty Knight:**  
402 Conceptualization, Methodology, Investigation, Resources, Project Administration, Supervision,  
403 Writing – Original Draft, Writing – Review & Editing.

404

### 405 **Conflict of Interest**

406

407 The authors declare no conflict of interest.

### 408 **Declaration of Competing Interests**

409 The authors declare that they have no known competing financial interests or personal  
410 relationships that could have appeared to influence the work reported in this paper.

#### 411 **Data Availability**

412 Data will be made available on request.

413

#### 414 **REFERENCES**

415

416 1. Adema C, Hillier L, Jones C. *et al.* Whole genome analysis of a schistosomiasis-transmitting  
417 freshwater snail. *Nat Commun* 8. 2017; 15451. <https://doi.org/10.1038/ncomms15451>. Accessed  
418 February 25, 2023.

419

420 2. Aggarwal M, Boone CD, Kondeti B, McKenna R. Structural annotation of human carbonic  
421 anhydrases. *Journal of Enzyme Inhibition and Medicinal Chemistry*. 2013, 28:2, 267-  
422 277, Doi: [10.3109/14756366.2012.737323](https://doi.org/10.3109/14756366.2012.737323). Accessed April 10, 2023.

423

424 3. Alterio V, Pan P, Parkkila S, Buonanno M, Supuran CT, Monti SM, De Simone G. The structural  
425 comparison between membrane-associated human carbonic anhydrases provides insights into  
426 drug design of selective inhibitors. *Biopolymers*. 2014;101(7):769-78. doi:  
427 [10.1002/bip.22456](https://doi.org/10.1002/bip.22456). Accessed April 4, 2023.

428

429 4. Altschul SF, Gish W, Miller W, Myers EW, Lipman DJ. Basic local alignment search tool. *J Mol*  
430 *Biol*. 1990;215(3):403-10. doi: [10.1016/S0022-2836\(05\)80360-2](https://doi.org/10.1016/S0022-2836(05)80360-2). Accessed April 13, 2023.

431

432 5. Angeli A, Pinteala M, Maier SS, Simionescu BC, Da'dara AA, Skelly PJ, Supuran CT.  
433 Sulfonamide Inhibition Studies of an  $\alpha$ -Carbonic Anhydrase from *Schistosoma mansoni*, a  
434 Platyhelminth Parasite Responsible for Schistosomiasis. *Int J Mol Sci*. 2020;21(5):1842. doi:  
435 [10.3390/ijms21051842](https://doi.org/10.3390/ijms21051842). Accessed April 11, 2023.



436

437 6.Arican-Goktas HD, Ittiprasert W, Bridger JM, Knight M. Differential spatial repositioning of  
438 activated genes in *Biomphalaria glabrata* snails infected with *Schistosoma mansoni*. *PLoS Negl*  
439 *Trop Dis*. 2014;8(9):e3013. doi: 10.1371/journal.pntd.0003013. Accessed March 30, 2023.

440

441 7.Becker HM. Carbonic anhydrase IX and acid transport in cancer. *Br J Cancer*. 2020; 122, 157–  
442 167. <https://doi.org/10.1038/s41416-019-0642-z>. Accessed April 13, 2023.

443

444 8.Boissier J, Grech-Angelini S, Webster BL, Allienne JF, Huyse T, Mas-Coma S, Toulza E, Barré-  
445 Cardi H, Rollinson D, Kincaid-Smith J, Oleaga A, Galinier R, Foata J, Rognon A, Berry A, Mouahid  
446 G, Henneron R, Moné H, Noel H, Mitta G. Outbreak of urogenital schistosomiasis in Corsica  
447 (France): an epidemiological case study. *Lancet Infect Dis*. 2016 Aug;16(8):971-9. doi:  
448 10.1016/S1473-3099(16)00175-4. Accessed April 8, 2023.

449

450 9.Bridger JM, Brindley PJ, Knight M. The snail *Biomphalaria glabrata* as a model to interrogate the  
451 molecular basis of complex human diseases. *PLoS Negl Trop Dis*. 2018,12(8): e0006552.  
452 <https://doi.org/10.1371/journal.pntd.0006552>. Accessed April 12, 2023.

453

454 10.Coelho, F.S., Rodpai, R., Miller, A. *et al*. Diminished adherence of *Biomphalaria*  
455 *glabrata* embryonic cell line to sporocysts of *Schistosoma mansoni* following programmed knockout  
456 of the allograft inflammatory factor. *Parasites Vectors* **13**, 511 (2020).  
457 <https://doi.org/10.1186/s13071-020-04384-9>.

458

459 11.Dvořanová J, Kugler M, Holub J, Šícha V, Das V, Nektivinda J, El Anwar S, Havránek M,  
460 Pospíšilová K, Fábry M, Král V, Medvedíková M, Matějková S, Lišková B, Gurská S, Džubák P,  
461 Brynda J, Hajdúch M, Grüner B, Řezáčová P. Sulfonamido carboranes as highly selective  
462 inhibitors of cancer-specific carbonic anhydrase IX. *Eur J Med Chem*. 2020; 200:112460. doi:  
463 10.1016/j.ejmech.2020.112460. Accessed April 3, 2023.

464

- 465 12. Ending the neglect to attain the Sustainable Development Goals: A road map for neglected  
466 tropical diseases 2021–2030. Geneva: World Health Organization; 2020. Licence:  
467 CC BY-NC-SA 3.0 IGO. Accessed April 10, 2023.  
468
- 469 13. Feitosa KA, Zaia MG, Rodrigues V, Castro CA, Correia RO, Pinto FG, Rossi KNZP, Avó LRS,  
470 Afonso A, Anibal FF. *Menthol and Menthone* Associated with Acetylsalicylic Acid and Their  
471 Relation to the Hepatic Fibrosis in *Schistosoma mansoni* Infected Mice. *Front Pharmacol*. 2018  
472 Jan 18;8:1000. doi: 10.3389/fphar.2017.01000. Accessed April 14, 2023.  
473
- 474 14. Hamburger J, Weil M & Pollack Y. Detection of *Schistosoma mansoni* DNA in extracts of whole  
475 individual snails by dot hybridization. *Parasitol Res*, 1987, 74, 97-100- doi: 10.1007/BF00534940.  
476
- 477 15. Hotez PJ, Engels D, Gyapong M, Ducker C, Malecela MN. Female Genital Schistosomiasis. *N*  
478 *Engl J Med*. 2019 Dec 26;381(26):2493-2495. doi: 10.1056/NEJMp1914709. Accessed March 30,  
479 2023.  
480
- 481 16. Hsieh M, Huang PJ, Chou PY, Wang SW, Lu HC, Su WW, Chung YC, Wu MH. Carbonic  
482 Anhydrase VIII (CAVIII) Gene Mediated Colorectal Cancer Growth and Angiogenesis through  
483 Mediated miRNA 16-5p. *Biomedicines*. 2022 Apr 29;10(5):1030. doi:  
484 10.3390/biomedicines10051030. Accessed April 3, 2023.  
485
- 486 17. Ittiprasert W, Nene R, Miller A, Raghavan N, Lewis F, Hodgson J, Knight M. *Schistosoma*  
487 *mansoni* infection of juvenile *Biomphalaria glabrata* induces a differential stress response between  
488 resistant and susceptible snails. *Exp Parasitol*. 2009 Nov;123(3):203-11. doi:  
489 10.1016/j.exppara.2009.07.015. Accessed March 30, 2023.  
490
- 491 18. Knight M, Arican-Goktas HD, Ittiprasert W, Odoemelam EC, Miller AN, Bridger JM.  
492 Schistosomes and snails: a molecular encounter. *Front Genet*. 2014 Jul 21;5:230. doi:  
493 10.3389/fgene.2014.00230. Accessed April 10, 2023.

494

495 19.Kokaliaris C, Garba A, Matuska M, Bronzan RN, Colley DG, et al. Effect of preventive  
496 chemotherapy with praziquantel on schistosomiasis among school-aged children in sub-Saharan  
497 Africa: a spatiotemporal modelling study. *Lancet Infect Dis*. 2022 Jan;22(1):136-149. doi:  
498 10.1016/S1473-3099(21)00090-6. Epub 2021 Dec 2. Erratum in: *Lancet Infect Dis*. 2022  
499 Jan;22(1):e1. Accessed April 13, 2023.

500

501 20.Mahon BP, Pinard MA, McKenna R. Targeting carbonic anhydrase IX activity and expression.  
502 *Molecules*. 2015 Jan 30;20(2):2323-48. doi: 10.3390/molecules20022323. Accessed April 13,  
503 2023.

504

505 21.McDonald PC, Chafe SC, Brown WS, Saberi S, Swayampakula M, Venkateswaran G,  
506 Nemirovsky O, Gillespie JA, Karasinska JM, Kalloger SE, Supuran CT, Schaeffer DF, Bashashati  
507 A, Shah SP, Topham JT, Yapp DT, Li J, Renouf DJ, Stanger BZ, Dedhar S. Regulation of pH by  
508 Carbonic Anhydrase 9 Mediates Survival of Pancreatic Cancer Cells With Activated KRAS in  
509 Response to Hypoxia. *Gastroenterology*. 2019 Sep;157(3):823-837. doi:  
510 10.1053/j.gastro.2019.05.004. Accessed April 3, 2023.

511

512 22.McManus, D.P., Dunne, D.W., Sacko, M. *et al*. Schistosomiasis. *Nat Rev Dis Primers* 4, 13  
513 (2018). <https://doi.org/10.1038/s41572-018-0013-8>. Accessed April 13, 2023.

514

515 23.Mussi S, Rezzola S, Chiodelli P, Nocentini A, Supuran CT, Ronca R. Antiproliferative effects of  
516 sulphonamide carbonic anhydrase inhibitors C18, SLC-0111 and acetazolamide on bladder,

517 glioblastoma and pancreatic cancer cell lines. *J Enzyme Inhib Med Chem*. 2022 Dec;37(1):280-  
518 286. doi: 10.1080/14756366.2021.2004592. Accessed April 3, 2023.

519

520 24.National Center for Biotechnology Information (2023). PubChem Compound Summary for CID  
521 16760658, Sodium Salicylate. Accessed April 13, 2023.

522

523 25.Ning WR, Jiang D, Liu XC, Huang YF, Peng ZP, Jiang ZZ, Kang T, Zhuang SM, Wu Y, Zheng  
524 L. Carbonic anhydrase XII mediates the survival and prometastatic functions of macrophages in  
525 human hepatocellular carcinoma. *J Clin Invest*. 2022 Apr 1;132(7):e153110. doi:  
526 10.1172/JCI153110. Accessed April 3, 2023.

527

528 26.Nishimori I, Vullo D, Innocenti A, Scozzafava A, Mastrolorenzo A, Supuran CT. Carbonic  
529 anhydrase inhibitors: inhibition of the transmembrane isozyme XIV with sulfonamides. *Bioorg Med*  
530 *Chem Lett*. 2005 Sep 1;15(17):3828-33. doi: 10.1016/j.bmcl.2005.06.055. Accessed April 10,  
531 2023.

532

533 27.Parasites- schistosomiasis. Centers for Disease Control and Prevention. 2018.  
534 <https://www.cdc.gov/parasites/schistosomiasis/index.html>. Accessed April 8, 2023.

535

536 28.Pastorekova S, Gillies RJ. The role of carbonic anhydrase IX in cancer development: links to  
537 hypoxia, acidosis, and beyond. *Cancer Metastasis Rev*. 2019 Jun;38(1-2):65-77. doi:  
538 10.1007/s10555-019-09799-0. Accessed March 27, 2023.

539

- 540 29. Pinard MA, Mahon B, McKenna R. Probing the surface of human carbonic anhydrase for clues  
541 towards the design of isoform specific inhibitors. *Biomed Res Int*. 2015;2015:453543. doi:  
542 10.1155/2015/453543. Accessed April 13, 2023.
- 543
- 544 30. Poggetti V, Salerno S, Baglini E, Barresi E, Da Settimo F, Taliani S. Carbonic Anhydrase  
545 Activators for Neurodegeneration: An Overview. *Molecules*. 2022 Apr 14;27(8):2544. doi:  
546 10.3390/molecules27082544. Accessed March 27, 2023.
- 547
- 548 31. Raghavan N, Miller AN, Gardner M, FitzGerald PC, Kerlavage AR, Johnston DA, Lewis FA,  
549 Knight M. Comparative gene analysis of *Biomphalaria glabrata* hemocytes pre- and post-exposure  
550 to miracidia of *Schistosoma mansoni*. *Mol Biochem Parasitol*. 2003 Feb;126(2):181-91. doi:  
551 10.1016/s0166-6851(02)00272-4. Accessed April 8, 2023.
- 552
- 553 32. Rothwell PM, Wilson M, Elwin CE, Norrving B, Algra A, Warlow CP, Meade TW. Long-term  
554 effect of aspirin on colorectal cancer incidence and mortality: 20-year follow-up of five randomised  
555 trials. *Lancet*. 2010 Nov 20;376(9754):1741-50. doi: 10.1016/S0140-6736(10)61543-7. Accessed  
556 April 5, 2023.
- 557
- 558 33. Schistosomiasis. The World Health Organization. 2023. [https://www.who.int/news-room/fact-](https://www.who.int/news-room/fact-sheets/detail/schistosomiasis)  
559 [sheets/detail/schistosomiasis](https://www.who.int/news-room/fact-sheets/detail/schistosomiasis). Accessed April 5, 2023.
- 560
- 561 34. Schmidt J, Oppermann E, Blaheta RA, Schreckenbach T, Lunger I, Rieger MA, Bechstein WO,  
562 Holzer K, Malkomes P. Carbonic-anhydrase IX expression is increased in thyroid cancer tissue  
563 and represents a potential therapeutic target to eradicate thyroid tumor-initiating cells. *Mol Cell*  
564 *Endocrinol*. 2021 Sep 15;535:111382. doi: 10.1016/j.mce.2021.111382. Accessed April 3, 2023.
- 565
- 566 35. Sievers F, Wilm A, Dineen D, et al. Fast, scalable generation of high-quality protein multiple  
567 sequence alignments using Clustal Omega. *Molecular Systems Biology*. 2011 Oct;7:539. DOI:  
568 10.1038/msb.2011.75. Accessed April 13, 2023.

569

570 36.Smith M, Yadav S, Fagunloye OG, Pels NA, Horton DA, Alsultan N, Borns A, Cousin C, Dixon  
571 F, Mann VH, Lee C, Brindley PJ, El-Sayed NM, Bridger JM, Knight M. PIWI silencing mechanism  
572 involving the retrotransposon nimbus orchestrates resistance to infection with *Schistosoma*  
573 *mansoni* in the snail vector, *Biomphalaria glabrata*. *PLoS Negl Trop Dis*. 2021 Sep  
574 8;15(9):e0009094. doi: 10.1371/journal.pntd.0009094. Accessed February 27, 2023.

575

576 37.Sostres C, Gargallo CJ, Lanás A. Aspirin, cyclooxygenase inhibition and colorectal cancer.  
577 *World J Gastrointest Pharmacol Ther*. 2014 Feb 6;5(1):40-9. doi: 10.4292/wjgpt.v5.i1.40. Accessed  
578 April 5, 2023.

579

580 38.Sudsarn P, Boonmars T, Ruangjirachuporn W, Namwat N, Loilome W, Sriraj P, Aukkanimart R,  
581 Nadchanan W, Jiraporn S. Combination of Praziquantel and Aspirin Minimizes Liver Pathology of  
582 Hamster *Opisthorchis viverrini* Infection Associated Cholangiocarcinoma. *Pathol Oncol Res*. 2016  
583 Jan;22(1):57-65. doi: 10.1007/s12253-015-9967-y. Accessed April 14, 2023.

584

585 39.Supuran CT. Carbonic anhydrases: novel therapeutic applications for inhibitors and activators.  
586 *Nature Reviews Drug Discovery* 7, no. 2 (2008): 168-181. doi: 10.1038/nrd2467. Accessed April  
587 13, 2023.

588

589 40.Svastová E, Hulíková A, Rafajová M, Zat'ovicová M, Gibadulinová A, Casini A, Cecchi A,  
590 Scozzafava A, Supuran CT, Pastorek J, Pastoreková S. Hypoxia activates the capacity of tumor-  
591 associated carbonic anhydrase IX to acidify extracellular pH. *FEBS Lett*. 2004 Nov 19;577(3):439-  
592 45. doi: 10.1016/j.febslet.2004.10.043. Accessed April 11, 2023.

593

594 41.Verjee MA. Schistosomiasis: Still a Cause of Significant Morbidity and Mortality. *Res Rep Trop*  
595 *Med*. 2019 Dec 31;10:153-163. doi: 10.2147/RRTM.S204345. Accessed March 8, 2023.

596

597 42.WHO. (2018). Schistosomiasis: Progress report 2001–2011, strategic plan 2012–2020.  
598 Geneva, Switzerland: World Health Organization. Retrieved from  
599 <https://www.who.int/schistosomiasis/resources/9789241503174/en/>. Accessed March 15, 2023.

600

601 43.Zolfaghari Emameh R, Barker HR, Turpeinen H, Parkkila S, Hytönen VP. A reverse vaccinology  
602 approach on transmembrane carbonic anhydrases from Plasmodium species as vaccine  
603 candidates for malaria prevention. *Malar J.* 2022 Jun 15;21(1):189. doi: 10.1186/s12936-022-  
604 04186-7. Accessed April 11, 2023.

605

606

607

608

609

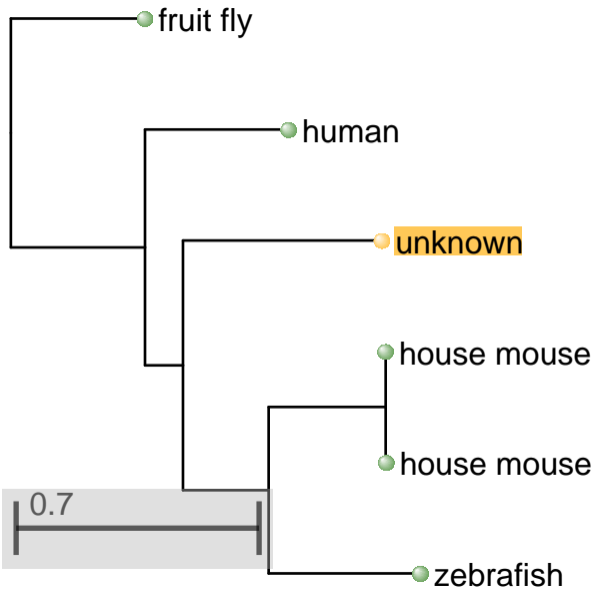



CA in *B. glabrata*

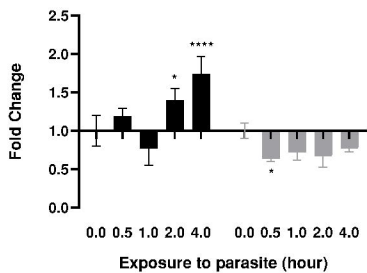

CA in *B. glabrata*

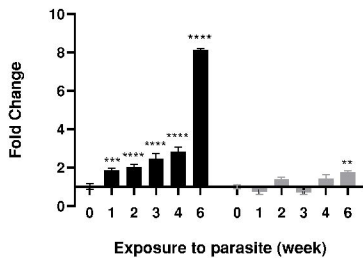

### CA in BGE cells

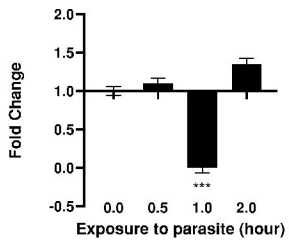

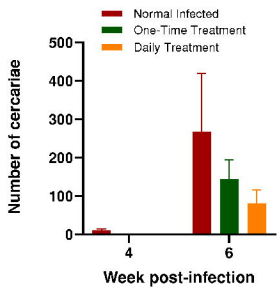

### CA in Sodium Salicylate-treated BBO2

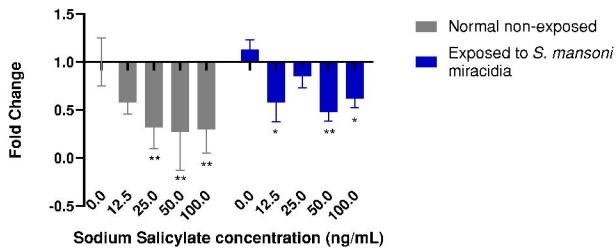

**Figure 1. Phylogenetic tree analysis highlighting *B. glabrata* carbonic anhydrase homolog's evolutionary relatedness to the human and other organisms.** The phylogenetic tree is based on amino-acid sequence alignment (ClustalW). Results indicate that *B. glabrata* is closely related to fruit fly (*D. melanogaster*) and other vertebrate organisms (house mouse, zebrafish and human). Unknown = *B. glabrata* homolog.

**Figure 2. qPCR analysis of RNA from susceptible BBO2 (black histograms) and resistant BS-90 (gray histograms) juvenile snails exposed for 30 min, 1 hour, 2 hours and 4 hours to the parasite *S. mansoni* miracidia.** Histograms show the expression of CA encoding transcript in *B. glabrata* snails at specific time points from four biological replicates (the total snails used for four biological replicates N=40). Note the increase in fold change in susceptible BBO2 snails compared to the resistant BS90 snails after parasite exposure. Fold change was determined as described previously by utilizing uniform expression of the reference transcript, \*\*\*\*,  $p \leq 0.0001$ , \*\*\*,  $p \leq 0.001$ , \*\*,  $p \leq 0.01$ , \*,  $p \leq 0.05$ , and ns,  $p > 0.05$ .

**Figure 3. qPCR analysis of RNA from susceptible BBO2 (black histograms) and resistant BS-90 (gray histograms) juvenile snails exposed for 2 hours and kept up to 6 weeks to the parasite *S. mansoni*.** Histograms show expression of CA transcripts in juvenile snails from three biological replicates (N=36). Non-exposed (0min) juvenile snails served as controls. A significant increase in fold change can be observed in the susceptible BBO2 snails compared to the resistant BS90 snails. \*\*\*\*,  $p \leq 0.0001$ , \*\*\*,  $p \leq 0.001$ , \*\*,  $p \leq 0.01$ , \*,  $p \leq 0.05$ , and ns,  $p > 0.05$ .

**Figure 4. qPCR analysis of RNA from *B. glabrata* embryonic cell line (BGE) co-cultured with *S. mansoni* miracidia.** BGE cells were exposed to *S. mansoni* miracidia for 30 min, 1 hour and 2 hours (N=8). Non-exposed (0min) BGE cells served as controls. \*\*\*\*,  $p \leq 0.0001$ , \*\*\*,  $p \leq 0.001$ , \*\*,  $p \leq 0.01$ , \*,  $p \leq 0.05$ , and ns,  $p > 0.05$ .

**Figure 5. Schistosome recovery from infected *B. glabrata* following treatment with 100 ng/ml sodium salicylate.** Susceptible BBO2 snails were treated overnight with 100 ng/mL sodium salicylate and exposed to *S. mansoni* miracidia (10-12 miracidia per snail) for two hours. The histograms show cercarial shedding in non-drug treated/infected snails (red); one-time drug treated (16 hours)/infected snails (green); and daily drug-treated/infected snails (yellow) from four biological replicates (N=12). The fold changes of the histograms were noted as non-significant (ns) through 2-way ANOVA analysis.

**Figure 6. qPCR analysis of RNA from susceptible juvenile BBO2 snails unexposed (gray histograms) and exposed (blue histograms) for 2 to the parasite *S. mansoni* miracidia.** Histograms show expression of carbonic anhydrase encoding transcript in normal non-drug treated juvenile snails (0 ng/ml) and those treated with sodium salicylate (12.5 ng/ml, 25 ng/ml, 50 ng/ml or 100 ng/ml) from three biological replicates (N=30). Non-exposed (0min) and non-drug treated snails served as controls. Note the upregulation of CA transcript in non-drug treated exposed snails and the downregulation in non-exposed and exposed drug-treated snail groups. \*\*\*\*,  $p \leq 0.0001$ , \*\*\*,  $p \leq 0.001$ , \*\*,  $p \leq 0.01$ , \*,  $p \leq 0.05$ , and ns,  $p > 0.05$ .

**Supplementary Figure 1. Multiple sequence alignment of the carbonic anhydrase enzyme between *B. glabrata* (accession number XP\_013085564.1) and *S. mansoni* (accession number QDD67328.1) obtained from Clustal Omega.** CA shares a 34.7% identity between the snail and the parasite *S. mansoni*. 100% amino acid match is indicated by an asterisk (letters marked in red).

**Supplementary Figure 2. Structure-based amino acid sequence alignment of the human Carbonic Anhydrase IX (accession number: Q16790) and *B. glabrata* Carbonic Anhydrase 14-like protein homolog (accession number XP\_013085564.1) obtained from Clustal Omega.** The two enzyme orthologs share 31.25% sequence identity and 35.97% identity in the catalytic sites (highlighted in yellow). 100% amino acid match is indicated by an asterisk (letters marked in red). Zinc-ion binding sites are shown in green.



# CLUSTAL O(1.2.4) multiple sequence alignment

bioRxiv preprint doi: <https://doi.org/10.1101/2023.05.10.540221>; this version posted August 21, 2023. The copyright holder for this preprint (which was not certified by peer review) is the author/funder, who has granted bioRxiv a license to display the preprint in perpetuity. It is made available under aCC-BY-NC-ND 4.0 International license.

|                |                                                                                                                             |     |
|----------------|-----------------------------------------------------------------------------------------------------------------------------|-----|
| <b>BgCAXIV</b> | MSRNRFRVQFLNRRIVVSNRKHSHFIMQGLAEVLRNKRDIIPSCGGDNGSFINIDINLTFE                                                               | 0   |
| <b>SmCA</b>    | -----                                                                                                                       | 0   |
| <b>BgCAXIV</b> | QSTLPLLAYQNYEKPPLSGMI LKNNGHTVELELLGDEIAIFAGGLAEPYIAKQFHFHWGS                                                               | 120 |
| <b>SmCA</b>    | -----                                                                                                                       | 0   |
| <b>BgCAXIV</b> | NLSKGSEHQLDKSYPMELSPLDNLGLKSLTDHLRNVAKPDTNVS IPTFSLNSFLPAFRS                                                                | 180 |
| <b>SmCA</b>    | -----                                                                                                                       | 0   |
| <b>BgCAXIV</b> | DFYRYDGLSTTPSCAESVIWTVFKD TVKISAKQLEAFRQVQSYENGEQVPMVDNYRVPVQP                                                              | 240 |
| <b>SmCA</b>    | -----MTYQW-----LIGIQIS-----L<br>: * * *                                                                                     | 13  |
| <b>BgCAXIV</b> | LYTRAVHRNFKIPPPKTHWSYEGS-HGASHWSSTYQFCASSATSRQSPIDIVSSH-MQNI                                                                | 298 |
| <b>SmCA</b>    | LFV-----NCICNGSEWSYTNILTGPETWHEHYKNMCSG--YYQSPIDLKTDISTLDL<br>*:. : :.*** . * . * . *: .* *****: :. ::                      | 64  |
| <b>BgCAXIV</b> | RLPPFIIEGYDSSNSITLDLKNNGHTVQADISGGNLFISGAGL-PGTYRAAQFHFHWGSD                                                                | 357 |
| <b>SmCA</b>    | KLKTVI IY-RNTSSTETT I QNNGHSAEVKFP RNTWFISFDGILDYKYEIIQM HFWGNT<br>:* .*: :*: * :*:*****: :. . ** * : .* * :*****.          | 123 |
| <b>BgCAXIV</b> | NKRGSEHLIEGRPYPLEIHIVHYNIDQP-DIIKAVTEKNGLAVLGLFEISEAD-----                                                                  | 410 |
| <b>SmCA</b>    | DDRGSEHTIDGFRFPLEGHIVSFRRQMYSSPSEAI GRPGGLAVLGLIMHQIVE SIKYEQTA<br>:.***** *: * :*** ** :. : . :* : . *****: :* * :         | 183 |
| <b>BgCAXIV</b> | NKGYEKIIDE LNVFSPYSRYQMNYQELRQ-LLPKNVNEFYRYEGSLTTPPECHETVWTI                                                                | 469 |
| <b>SmCA</b>    | FKAYNNFSGV LNSQFVPPNNSTIDDINLALLLSLLNPSRYFRYLGSLTTPPC TENVLWTI<br>* .*: :. ** . * * .. : : * * * * ..: ** ***** * * . * **: | 243 |
| <b>BgCAXIV</b> | FKETMKISTRQLMKFRVYTEREDLLQVPLVDNFRPVQPLNKRTIISNFP-YSSISSG-S                                                                 | 527 |
| <b>SmCA</b>    | FIDPVLITREQINLFRNLPYG-SNEKQ TSMGDNFRPIQLNPIDTLASRTL YRATASSLS<br>* : : *: .*: **.: :. * . : *****:* ** :.. * : :*. *        | 302 |
| <b>BgCAXIV</b> | RLTLTVSMFVI--ASLCAILH 546                                                                                                   |     |
| <b>SmCA</b>    | LLSLGILYIMITSQLSVIFL 323<br>*:*: :*: :.*..*:                                                                                |     |

# CLUSTAL O (1.2.4) multiple sequence alignment

bioRxiv preprint doi: <https://doi.org/10.1101/2023.05.10.540221>; this version posted August 21, 2023. The copyright holder for this preprint (which was not certified by peer review) is the author/funder, who has granted bioRxiv a license to display the preprint in perpetuity. It is made available under aCC-BY-NC-ND 4.0 International license.

|         |                                                                      |     |
|---------|----------------------------------------------------------------------|-----|
| BgCAIXV | MSKNFRVYQPLNKRITVQNRKPEHLMQKSLRPLRQKQVPSLQVQSEIQLDINITIG             | 80  |
| hCAIX   | -----MAPLCSPWLPLLIP-----                                             | 15  |
|         | * *                                                                  |     |
| BgCAIXV | QSTLPLLAYQNYEKPLSGMILKNNGHTVLELELLGDEIAIFAGGLAEPYIAKQF-HFHWG         | 119 |
| hCAIX   | -----APAP-----GLTVQ--LLLSLLLL-----VPVHPQRLPRMQED                     | 46  |
|         | * * ** ** *                                                          |     |
| BgCAIXV | SNLSKGSEHQLDKSYPMELSPLDNLGLKSLTDHLRNVAKPDTNVSIPTFSLNSFLPAFR          | 179 |
| hCAIX   | SPLGGGSSG-----EDDPLGEEDLPSEEDSPREEDPPG-EEDLPG---EEDLP--              | 90  |
|         | * * ** * ** * * * * *                                                |     |
| BgCAIXV | SDFYRYDGSLLTTPSCAESVIWTVFKDVTKISAKQLEAFRQVQSYENGEQVPMVDNYPVQ         | 239 |
| hCAIX   | -----GEEDLPE-----VKPKSEEEGSLKL-----EDLPTVEA--PGD                     | 121 |
|         | * * * * * * * *                                                      |     |
| BgCAIXV | PLYTRAVHRNFKIPPP <b>KTHWSYEGSHGASHWSSTYQFCASSATSRQSPIDIVSSHM-QNI</b> | 298 |
| hCAIX   | PQEPQNNAHRDKEGDD <b>QSHWRYGGD---PPWPRVSPACAGRF---QSPVDIRPQLAAFCF</b> | 175 |
|         | * * ** * * * ** *** **                                               |     |
| BgCAIXV | <b>RLPFFILEGYDSSNSITLDLKNNGHTVQADISGNLFISGAGLPGTYRAAQFELHWGSDN</b>   | 358 |
| hCAIX   | <b>ALRPLEILGFQLPPLPELRLRNNGHSVQLTLPPGLEMALGP--GREYRALQLHLHWGAAG</b>  | 233 |
|         | * * * * * * * * * * * * * * * *                                      |     |
| BgCAIXV | <b>KRGSEHLIEGRPYPLEIIVHYNIDQPDIKAVTEKNGLAVLGILFEISEADNKGYEKII</b>    | 418 |
| hCAIX   | <b>RPGSEHTVEGHRFPAEIIIVHLSSTAFARVDEALGRPGGLAVLAFLLEGPEENSAYEQLL</b>  | 293 |
|         | **** ** * *** ** * * * * * * * * * *                                 |     |
| BgCAIXV | <b>DELNNVFSPYSRYQMNQELRQLLPKNVNEFYRYEGSLTTPPECHETVTWTIFKETMKIST</b>  | 478 |
| hCAIX   | <b>SRLEEIAEEGSETQVPLGLDISALLPSDFSRYFQYEGSLTTPPCAQGVITVFNQIVMLSA</b>  | 353 |
|         | * * * * * * * * * * * * * * * *                                      |     |
| BgCAIXV | <b>RQLMKFRRVYTEREDLLQVPLVDNFRPVQPLNKRTIISNFPYSSISSGS-----</b>        | 527 |
| hCAIX   | <b>KQLHTLSDTLWGP---DSRLQLNFRATQPLNGRVIEASFFAGVDSSPRAAEPVQLNSCL</b>   | 410 |
|         | ** * * * * * * * * * * * * * *                                       |     |
| BgCAIXV | ----RLTLTVSMF-VIASLCAILH-----                                        | 546 |
| hCAIX   | AAGDILALVFGLLFAVTSVAFLVQMRRQHRRTKGGVSYRPAEVAETGA                     | 459 |
|         | * * *                                                                |     |
